# Supplementary material
Source: MDPI journal article supplement (https://www.mdpi.com/2075-163X/13/11/1440)
Supplement: s1 [file s1]

**Table S1.** Main element oxide contents by XRF (wt%), trace element and REE contents (ppm,  $\mu\text{g}\cdot\text{g}^{-1}$ ) by HR-ICP-MS, and relative standard deviations (%RSD) for reference materials JH-1, JB-3, BHVO-1, UB-N.  $\text{Fe}_2\text{O}_3^{\text{T}}$  represents total iron content. Certified values from GEOREM (<http://georem.mpch-mainz.gwdg.de>). Further explanation in text.

| material                                                                     | measured | JB-3<br>certified | %RSD   | measured | JH-1<br>certified   | %RSD   |
|------------------------------------------------------------------------------|----------|-------------------|--------|----------|---------------------|--------|
| main element oxide contents in weight percent (wt%)                          |          |                   |        |          |                     |        |
| $\text{SiO}_2$                                                               | 49.621   | 50.960            | 1.882  | 47.997   | 48.180              | 0.269  |
| $\text{TiO}_2$                                                               | 1.269    | 1.440             | 8.927  | 0.640    | 0.670               | 3.239  |
| $\text{Al}_2\text{O}_3$                                                      | 17.256   | 17.200            | 0.229  | 5.659    | 5.660               | 0.012  |
| $\text{Fe}_2\text{O}_3^{\text{T}}$                                           | 11.060   | 11.820            | 4.698  | 9.957    | 10.270              | 2.188  |
| CaO                                                                          | 9.752    | 9.790             | 0.275  | 15.111   | 15.020              | 0.427  |
| MgO                                                                          | 4.561    | 5.190             | 9.126  | 16.831   | 16.730              | 0.426  |
| $\text{Na}_2\text{O}$                                                        | 2.887    | 2.730             | 3.947  | 0.697    | 0.710               | 1.307  |
| $\text{K}_2\text{O}$                                                         | 0.837    | 0.780             | 4.943  | 0.530    | 0.530               | 0.000  |
| MnO                                                                          | 0.156    | 0.177             | 8.918  | 0.143    | 0.190               | 19.960 |
| $\text{P}_2\text{O}_5$                                                       | 0.319    | 0.294             | 5.712  | 0.110    | 0.099               | 7.443  |
| analytical sum                                                               | 97.399   | 100.087           | 97.314 | 97.565   | 97.960              | 99.596 |
| material                                                                     | measured | UB-N<br>certified | %RSD   | measured | BHVO-1<br>certified | %RSD   |
| trace element contents in ppm ( $\mu\text{g}\cdot\text{g}^{-1}$ )            |          |                   |        |          |                     |        |
| Sc                                                                           | 13.133   | 13.000            | 0.720  | 31.550   | 31.800              | 0.559  |
| V                                                                            | 75.460   | 75.000            | 0.432  | 313.310  | 317.000             | 0.828  |
| Cr                                                                           | 2304.915 | 2300.000          | 0.151  | 284.379  | 289.000             | 1.140  |
| Co                                                                           | 99.771   | 100.000           | 0.162  | 44.692   | 45.000              | 0.485  |
| Ni                                                                           | 1981.532 | 2000.000          | 0.656  | 121.078  | 121.000             | 0.045  |
| Cu                                                                           | 28.044   | 28.000            | 0.110  | 134.792  | 136.000             | 0.631  |
| Zn                                                                           | 79.246   | 85.000            | 4.954  | 97.326   | 105.000             | 5.364  |
| Ga                                                                           | 3.013    | 3.000             | 0.301  | 21.184   | 21.000              | 0.617  |
| Rb                                                                           | 4.064    | 4.000             | 1.117  | 11.031   | 11.000              | 0.201  |
| Sr                                                                           | 9.112    | 9.000             | 0.872  | 406.294  | 403.000             | 0.576  |
| Y                                                                            | 2.505    | 2.500             | 0.134  | 27.608   | 27.600              | 0.020  |
| Zr                                                                           | 3.911    | 4.000             | 1.583  | 178.530  | 179.000             | 0.186  |
| Nb                                                                           | 0.047    | 0.050             | 3.818  | 18.949   | 19.000              | 0.190  |
| Cs                                                                           | 10.032   | 10.000            | 0.229  | 0.129    | 0.130               | 0.447  |
| Ba                                                                           | 27.292   | 27.000            | 0.762  | 140.246  | 139.000             | 0.631  |
| Hf                                                                           | 0.101    | 0.100             | 0.519  | 4.416    | 4.380               | 0.582  |
| Ta                                                                           | 0.020    | 0.020             | 0.171  | 1.230    | 1.230               | 0.027  |
| Th                                                                           | 0.068    | 0.070             | 1.789  | 1.098    | 1.080               | 1.151  |
| U                                                                            | 0.067    | 0.070             | 3.501  | 0.430    | 0.420               | 1.685  |
| analytical sum                                                               | 4642.333 | 4660.810          | 99.603 | 1838.272 | 1851.640            | 99.278 |
| rare-earth element (REE) contents in ppm ( $\mu\text{g}\cdot\text{g}^{-1}$ ) |          |                   |        |          |                     |        |
| La                                                                           | 0.348    | 0.350             | 0.453  | 15.811   | 15.800              | 0.049  |
| Ce                                                                           | 0.800    | 0.800             | 0.034  | 39.131   | 39.000              | 0.238  |
| Pr                                                                           | 0.119    | 0.120             | 0.387  | 5.703    | 5.700               | 0.032  |
| Nd                                                                           | 0.596    | 0.600             | 0.508  | 25.308   | 25.200              | 0.302  |
| Sm                                                                           | 0.193    | 0.200             | 2.341  | 6.219    | 6.200               | 0.220  |
| Eu                                                                           | 0.082    | 0.080             | 1.665  | 2.075    | 2.060               | 0.512  |
| Gd                                                                           | 0.303    | 0.300             | 0.593  | 6.487    | 6.400               | 0.958  |
| Tb                                                                           | 0.057    | 0.060             | 3.288  | 0.976    | 0.960               | 1.177  |
| Dy                                                                           | 0.381    | 0.380             | 0.232  | 5.275    | 5.200               | 1.007  |
| Ho                                                                           | 0.093    | 0.090             | 2.071  | 1.002    | 0.990               | 0.853  |
| Er                                                                           | 0.281    | 0.280             | 0.315  | 2.421    | 2.400               | 0.610  |
| Tm                                                                           | 0.042    | 0.050             | 12.489 | 0.337    | 0.330               | 1.567  |
| Yb                                                                           | 0.282    | 0.280             | 0.387  | 2.043    | 2.020               | 0.808  |
| Lu                                                                           | 0.044    | 0.050             | 9.613  | 0.294    | 0.290               | 1.036  |

---

|                |       |       |        |         |         |         |
|----------------|-------|-------|--------|---------|---------|---------|
| analytical sum | 3.621 | 3.640 | 99.478 | 113.082 | 112.550 | 100.472 |
|----------------|-------|-------|--------|---------|---------|---------|

**Table S2** – The geochemical comparison of different high-Mg mafic rocks and boninites from various Archean and Phanerozoic tectonic setting

| geochemistry                                                           | Boninites            |                     |                            |                      |                      |                   |                  | Bababuda             |                                                  |                               |                              |
|------------------------------------------------------------------------|----------------------|---------------------|----------------------------|----------------------|----------------------|-------------------|------------------|----------------------|--------------------------------------------------|-------------------------------|------------------------------|
|                                                                        | Dharwar <sup>1</sup> | Bastar <sup>2</sup> | Singhbhu<br>m <sup>3</sup> | Archean <sup>4</sup> | Abitibi <sup>5</sup> | Isua <sup>6</sup> | Phanerozoic<br>7 | Sukinda <sup>8</sup> | Paleoproterozoic<br>high-Mg norites <sup>9</sup> | Archean<br>SHMB <sup>10</sup> | n<br>komatiites <sup>1</sup> |
| main element oxide contents in weight percent (wt%)                    |                      |                     |                            |                      |                      |                   |                  |                      |                                                  |                               |                              |
| SiO <sub>2</sub>                                                       | 45.23–<br>52.30      | 52.23–54.12         | 42.00–<br>46.74            | 52.00–<br>54.00      | 44.1–60.6            | 46.73–<br>54.05   | 52.40–61.30      | 37.83-54.31          | 47.00–56.00                                      | 51.00–57.0<br>0               | 37.17-47.09                  |
| TiO <sub>2</sub>                                                       | 0.22–0.36            | 0.26–0.39           | 0.10–0.16                  | 0.24–0.28            | 0.14–0.64            | 0.17–0.40         | 0.07–0.50        | 0.01-0.12            | 0.30–1.00                                        | 0.40–1.00                     | 0.13-1.06                    |
| Al <sub>2</sub> O <sub>3</sub>                                         | 8.78–14.10           | 8.97–16.55          | 5.71–8.69                  | 16.60–<br>17.60      | 12.9–24.9            | 14.09–<br>20.24   | 6.10–15.00       | 0.74-3.23            | 6.80–16.10                                       | 9.90–13.00                    | 3.10-13.30                   |
| Fe <sub>2</sub> O <sub>3</sub>                                         | 9.96–12.49           | 7.51–10.73          | 7.05–8.65                  | 8.40–9.70            | 6.25–13.6            | 8.18–11.94        | 7.10–11.10       | 3.23-10.94           | 8.60–13.00                                       | 9.50–11.40                    | 10.55-12.64                  |
| MgO                                                                    | 12.51–<br>24.10      | 8.31–13.10          | 30.58–<br>32.91            | 7.80–8.60            | 3.14–24.5            | 6.76–16.06        | 4.50–21.70       | 32.32-47.93          | 5.70–21.60                                       | 9.50–16.50                    | 25.78-35.80                  |
| trace element contents in parts per million (ppm; µg·g <sup>-1</sup> ) |                      |                     |                            |                      |                      |                   |                  |                      |                                                  |                               |                              |
| Zr                                                                     | 12–23                | 35–50               | 1.00–3.10                  | 33–41                | 9.7–36               | 12.1–25.4         | 8–55             | 0.60-7.07            | 37–128                                           | 41–74                         | 4.1-166                      |
| Nb                                                                     | 0.34–6.26            | 0–1.0               | 0.06–1.10                  | 1.1–1.5              | 0.27–1.9             | 1.10–0.80         | 0.05–2.0         | 0.04-0.57            | 1.0–8.0                                          | 2.8–3.5                       | 0.04-1.50                    |
| Sc                                                                     | 14–59                | 31–45               | 16–41                      | 35–42                | 32–71                | 26–49             | 29–53            | 2.31-15.67           | 22–40                                            | 28–43                         | 3.8-32.6                     |
| V                                                                      | 56–141               | 146–187             | 78–161                     | 157–174              | 130–270              | 162–306           | 131–343          | 10.05-<br>150.56     | 120–312                                          | 147–208                       | 73-315                       |
| Yb                                                                     | 1.10–2.25            | 0.80–1.10           | 0.38–0.75                  | 1.09–1.67            | 1.13–3.62            | 0.94–1.84         | 0.30–2.40        | 0.08-0.75            | –                                                | 1.88                          | 0.18-1.18                    |
| selected element ratios                                                |                      |                     |                            |                      |                      |                   |                  |                      |                                                  |                               |                              |
| Mg#                                                                    | 70–82                | 66–74               | 80–83                      | 62–67                | 51–83                | 61–77             | 42–76            | 78-93                | 56–80                                            | 69–75                         | 84-87                        |
| Al <sub>2</sub> O <sub>3</sub> /TiO <sub>2</sub>                       | 29–50                | 28.03–63.65         | 48.50–<br>67.42            | 62–67                | 26–100               | 44–93             | 27–133           | 27.0-74.05           | 13–34                                            | 20–30                         | 10.0-59.0                    |
| CaO/Al <sub>2</sub> O <sub>3</sub>                                     | 0.81–1.00            | 0.35–1.38           | 0.36–1.08                  | –                    | –                    | –                 | –                | 0.016-1.24           | –                                                | –                             | 0.3-1.3                      |
| (Gd/Yb) <sub>N</sub>                                                   | 0.56–0.66            | 1.03-1.38           | 0.44–0.59                  | –                    | 0.3–0.7              | –                 | –                | 0.47-3.71            | –                                                | –                             | 0.4-1.1                      |
| Ti/Zr                                                                  | 78–113               | 44.54–51.84         | 286.72–<br>839.30          | 40–44                | 60–110               | 59–112            | 22–163           | 10.74-<br>215.33     | 26–87                                            | 44–85                         | 20.94-<br>190.05             |
| Ti/V                                                                   | 11–33                | 10.26–13.59         | 4.83–6.98                  | 9–10                 | 5.90–16.00           | –                 | 3–15             | 0.83-19.23           | 9–23                                             | 13–24                         | 6.58-23.79                   |
| Ti/Sc                                                                  | 27–115               | 42.62–75.42         | 20.61–<br>40.14            | 34–45                | –                    | –                 | 11–84            | 7.14-83.72           | 70–211                                           | 73–125                        | 40.36-<br>914.87             |
| Th/Ce                                                                  | 0.03–0.12            | 0.13-0.22           | 0.02–0.12                  | –                    | –                    | –                 | –                | 0.03-0.17            | –                                                | –                             | 0.020-0.188                  |

references: 1,3:[103,46]; 2,7:[104]; 4:[104]; 5:[124]; 6: [102];10: [64]; 11:[112]; 8:**this study**; 9:[58,59,162,163].

**Table S3:** Calculated parental melt of the Sukinda ultramafic complex chromites and chemical characteristics of boninites compared with other Archean-Paleoproterozoic mafic-ultramafic magmas of Peninsular India and primitive melts of different tectonic settings.

| cratons and tectonic setting                     | Al <sub>2</sub> O <sub>3</sub> wt% in melt | TiO <sub>2</sub> wt% in melt | references        |
|--------------------------------------------------|--------------------------------------------|------------------------------|-------------------|
| <i>Singhbhum craton</i>                          |                                            |                              |                   |
| Sukinda chromites, Kaliapani area                | (09.93-12.82)                              | (0.20-0.33)                  | <b>this study</b> |
| Sukinda chromites, Kathpal area                  | (11.02-13.05)                              | (0.27-0.54)                  | <b>this study</b> |
| Nuasahi chromites                                | 10.3-11                                    | -                            | [10]              |
| Malangtoli boninites                             | 8.46-10.11                                 | 0.30-0.36                    | [46]              |
| Roro-Jojohatu boninite (SSZ)                     | 9.67 to 11.03                              | -                            | [164]             |
| Boninitic dykes, SinghbhumGranitoid Complex.     | 9.65-12.32                                 | 0.27-0.5                     | [165]             |
| Tua-Dungri komatiites                            | 1.36-2.95                                  | 0.39-0.56                    | [35]              |
| <i>Baster Craton</i>                             |                                            |                              |                   |
| Sonakhan Greenstone Belt (SGB) chromites         | 10.75-12.52                                | 0.26-1.19                    | [78]              |
| SGB SHMB                                         | 8.05-12.88                                 | 0.62-0.79                    | [78]              |
| Southern Bastar boninite                         | 12.70-14.48                                | 0.46-0.95                    | [104]             |
| Southern Bastar SHMB                             | 8.11-16.55                                 | 0.26-1.11                    | [114]             |
| Dongargarh SHMB                                  | 2.55                                       | 0.50                         | [101]             |
| <i>Dharwar Craton</i>                            |                                            |                              |                   |
| Nuggihalli chromites                             | 8.39                                       | 0.63                         | [166]             |
| Gadwal greenstone belt boninites                 | 8.78-14                                    | 0.24-0.36                    | [103]             |
| Kushtagi-Hungund greenstone belt boninites       | 13.45-16.26                                | 0.56-0.59                    | [167]             |
| Kushtagi-Hungund greenstone belt high-Mg basalts | 8.27-12.42                                 | 0.64-0.88                    | [167]             |
| Kalyadi belt Komatiitic basalts                  | 4.95-7.9                                   | 0.27-0.4                     | [168]             |
| Nagamangala greenstone belt komatiites           | 3.71-5.32                                  | 0.22-0.36                    | [169]             |
| Banasandra komatiites                            | 3.5-17.42                                  | 0.06-0.42                    | [170]             |
| Sigegudda greenstone terrane komatiites          | 5.53-14.13                                 | 0.29-0.40                    | [171]             |
| Sandur Superterrane komatiites                   | 6.37-7.48                                  | 0.3-0.4                      | [172]             |
| <i>Bundelkhand Craton</i>                        |                                            |                              |                   |
| Mauranipur basaltic komatiite                    | 12.56-14.72                                | 0.65-0.73                    | [173]             |
| Pindar ultramafic rocks                          | 2.0-8.3                                    | 0.2-0.5                      | [174]             |
| Boninites (SSZ)                                  | 10.60-14.40                                | 0.10-0.52                    | [80]              |
| MORB                                             | ~15                                        | 0.32-2.20                    | [68]              |

|                      |               |             |           |
|----------------------|---------------|-------------|-----------|
| BABB                 | ~17           | 0.45–1.45   | [68],[86] |
| Bir Tuluha ophiolite | 10.67 - 11.56 | 0.33 - 0.36 | [175]     |
| Chromitites (Oman)   | 11.8–12.9     | 0.23–0.34   | [75]      |
| SED Egypt            | 9.12–12.12    | 0.42–0.79   | [176]     |

---
